# Supplementary material for: Implementing Brazil’s Forest Code: a vital contribution to securing forests and conserving biodiversity
Source: Springer Nature journal article supplement (doi:10.1007/s10531-021-02159-x), 2021-04-03
Supplement: MOESM1 [file 19034832]

## Supplementary information

Implementing Brazil's Forest Code: A vital contribution to securing forests and conserving biodiversity

Rebecca C. Brock<sup>1</sup>; Andy Arnell<sup>1</sup>; Will Simonson<sup>1</sup>; Aline C Soterroni<sup>2,3</sup>; Aline Mosnier<sup>2</sup>; Fernando Ramos<sup>3</sup>; Alexandre Xavier Ywata de Carvalho<sup>4</sup>; Gilberto Camara<sup>3</sup>; Johannes Pirker<sup>2</sup>; Michael Obersteiner<sup>2</sup>; Valerie Kapos<sup>1</sup>

1 United Nations Environment Programme World Conservation Monitoring Centre, Cambridge, UK

2 International Institute for Applied Systems Analysis, Laxenburg, Austria

3 National Institute for Space Research, São José dos Campos, Brazil

Corresponding author: [Rebecca.mant@cantab.net](mailto:Rebecca.mant@cantab.net)

### Modelling of the environmental reserve quota mechanism (CRA)

The tradeable debt and surplus within the environmental reserve quota mechanism (CRA) was estimated in the model. The amount of land that the law requires to be protected, the legal reserve (LR), was calculated by multiplying the amount of land in a pixel by the percentage of the LR requirement in that pixel. The LR surplus for each gridcell was calculated as the amount of native vegetation that exceeds the legal reserve. Environmental debts, downscaled to 50 km x 50 km pixels were based on CAR data (Guidotti et al., 2017) downloaded in December 2016. Given the uncertainties regarding the future use of public areas in the state of Amazonas, we assume that only 20% of the unclaimed public lands in this state will be designated as private property. Hence, only 20% of forest surpluses in this region are considered in the CRA stock estimates. Without this assumption, the amount of forest surpluses in the Amazonas state alone would be more than enough to compensate all the LR debts within the whole Amazon biome. In terms of the debt offset mechanism we assume that: (1) environmental debts will be compensated by the quota system only in cells with deficits overlapping soybean and sugarcane production, (2) cells with larger deficits are compensated first, and (3) cells with larger surpluses are used first to offset the debts within the same biome. See Soterroni et al. (2018) for more details.

Table S1: List of species included in the analysis. The list includes all mammals, amphibians and birds that had been identified by the Brazilian government as threatened, and for which extent of occurrence data was available from the IUCN Red List. The 311 species are listed alphabetically by genus.

|                                   |                                   |                                   |
|-----------------------------------|-----------------------------------|-----------------------------------|
| <i>Acrobatornis fonsecai</i>      | <i>Campylorhamphus</i>            | <i>Dendrocincla merula</i>        |
| <i>Adelophryne maranguapensis</i> | <i>procurvoides</i>               | <i>Dendrocolaptes certhia</i>     |
| <i>Akodon mystax</i>              | <i>Campylorhamphus</i>            | <i>Dendrocolaptes picumnus</i>    |
| <i>Alectrurus tricolor</i>        | <i>trochilirostris</i>            | <i>Diomedea dabbenena</i>         |
| <i>Allobates goianus</i>          | <i>Capito dayi</i>                | <i>Diomedea exulans</i>           |
| <i>Allobates olfersioides</i>     | <i>Carduelis yarrellii</i>        | <i>Discosura langsdorffi</i>      |
| <i>Alouatta belzebul</i>          | <i>Carpornis melanocephala</i>    | <i>Dysithamnus plumbeus</i>       |
| <i>Alouatta discolor</i>          | <i>Caryothraustes canadensis</i>  | <i>Eleoscytalopus psychopomus</i> |
| <i>Alouatta guariba</i>           | <i>Cebus cay</i>                  | <i>Eleothreptus candicans</i>     |
| <i>Alouatta ululata</i>           | <i>Cebus flavius</i>              | <i>Euryoryzomys lamia</i>         |
| <i>Amazona pretrei</i>            | <i>Cebus kaapori</i>              | <i>Formicivora erythronotos</i>   |
| <i>Amazona rhodocorytha</i>       | <i>Cebus robustus</i>             | <i>Formicivora grantsaui</i>      |
| <i>Amazona vinacea</i>            | <i>Cebus xanthosternus</i>        | <i>Formicivora littoralis</i>     |
| <i>Anodorhynchus leari</i>        | <i>Celeus flavus</i>              | <i>Fregata ariel</i>              |
| <i>Anthus nattereri</i>           | <i>Celeus obrieni</i>             | <i>Furipterus horrens</i>         |
| <i>Antilophia bokermanni</i>      | <i>Celeus torquatus</i>           | <i>Geositta poeciloptera</i>      |
| <i>Aratinga solstitialis</i>      | <i>Cercomacra ferdinandi</i>      | <i>Glaucis dohrnii</i>            |
| <i>Arremonops conirostris</i>     | <i>Chaetomys subspinosus</i>      | <i>Glyphonycteris behnii</i>      |
| <i>Ateles belzebuth</i>           | <i>Chamaeza nobilis</i>           | <i>Grallaria varia</i>            |
| <i>Ateles chamek</i>              | <i>Chiasmocleis alagoanus</i>     | <i>Guaruba guarouba</i>           |
| <i>Ateles marginatus</i>          | <i>Chiropotes satanas</i>         | <i>Gubernatrix cristata</i>       |
| <i>Atelocynus microtis</i>        | <i>Chiropotes utahickae</i>       | <i>Harpia harpyja</i>             |
| <i>Attila spadiceus</i>           | <i>Chrysocyon brachyurus</i>      | <i>Hemitriccus furcatus</i>       |
| <i>Augastes lumachella</i>        | <i>Ciccaba huhula</i>             | <i>Hemitriccus griseipectus</i>   |
| <i>Automolus lammi</i>            | <i>Cichlopsis leucogenys</i>      | <i>Hemitriccus kaempferi</i>      |
| <i>Blastocercus dichotomus</i>    | <i>Circus cinereus</i>            | <i>Hemitriccus mirandae</i>       |
| <i>Bokermannohyla vulcaniae</i>   | <i>Claravis geoffroyi</i>         | <i>Herpailurus yagouaroundi</i>   |
| <i>Bolitoglossa paraensis</i>     | <i>Columbina cyanopsis</i>        | <i>Herpsilochmus pileatus</i>     |
| <i>Brachycephalus pernix</i>      | <i>Conopophaga lineata</i>        | <i>Holoaden bradei</i>            |
| <i>Brachyteles arachnoides</i>    | <i>Conopophaga melanops</i>       | <i>Holoaden luederwaldti</i>      |
| <i>Brachyteles hypoxanthus</i>    | <i>Conothraupis mesoleuca</i>     | <i>Hylatomus galeatus</i>         |
| <i>Bradypus torquatus</i>         | <i>Coryphas piza melanotis</i>    | <i>Hylexetastes brigidai</i>      |
| <i>Buteogallus coronatus</i>      | <i>Coryphistera alaudina</i>      | <i>Hylomantis granulosa</i>       |
| <i>Buteogallus lacernulatus</i>   | <i>Cotinga maculata</i>           | <i>Hylopezus macularius</i>       |
| <i>Cacajao hosomi</i>             | <i>Cranioleuca muelleri</i>       | <i>Hylophilus ochraceiceps</i>    |
| <i>Calidris canutus</i>           | <i>Crax blumenbachii</i>          | <i>Hypocnemis ochrogyna</i>       |
| <i>Calidris pusilla</i>           | <i>Crax fasciolata</i>            | <i>Hypsiboas cymbalum</i>         |
| <i>Calidris subruficollis</i>     | <i>Crax globulosa</i>             | <i>Hypsiboas semiguttatus</i>     |
| <i>Callicebus barbarabrownae</i>  | <i>Crossodactylus dantei</i>      | <i>Inia geoffrensis</i>           |
| <i>Callicebus coimbrai</i>        | <i>Crossodactylus lutzorum</i>    | <i>Iodopleura pipra</i>           |
| <i>Callicebus melanochir</i>      | <i>Crypturellus noctivagus</i>    | <i>Ischnocnema manezinho</i>      |
| <i>Callicebus personatus</i>      | <i>Ctenomys minutus</i>           | <i>Kerodon acrobata</i>           |
| <i>Callistomys pictus</i>         | <i>Curaeus forbesi</i>            | <i>Kerodon rupestris</i>          |
| <i>Callithrix aurita</i>          | <i>Cycloramphus diringshofeni</i> | <i>Kunsia fronto</i>              |
| <i>Callithrix flaviceps</i>       | <i>Cycloramphus faustoi</i>       | <i>Lagothrix cana</i>             |
| <i>Caluromysiops irrupta</i>      | <i>Cycloramphus ohausi</i>        | <i>Lagothrix lagotricha</i>       |
| <i>Calyptura cristata</i>         | <i>Dendrexetastes rufigula</i>    | <i>Lagothrix poeppigii</i>        |

|                              |                            |                             |
|------------------------------|----------------------------|-----------------------------|
| Leontopithecus caissara      | Penelope ochrogaster       | Saimiri vanzolinii          |
| Leontopithecus chrysomelas   | Penelope pileata           | Schiffornis turdina         |
| Leontopithecus chrysopygus   | Penelope superciliaris     | Scinax duartei              |
| Leontopithecus rosalia       | Phaethornis aethopygus     | Sclerurus caudacutus        |
| Leopardus colocolo           | Phaethornis bourcieri      | Sclerurus mexicanus         |
| Leopardus geoffroyi          | Phaethornis malaris        | Sclerurus scansor           |
| Leopardus tigrinus           | Phlegopsis nigromaculata   | Scytalopus diamantinensis   |
| Leopardus wiedii             | Phyllodytes gyrinaethes    | Scytalopus iraiensis        |
| Lepidocolaptes squamatus     | Phyllomys lundii           | Scytalopus novacapitalis    |
| Lepidothrix iris             | Phyllomys thomasi          | Selenidera gouldii          |
| Lepidothrix vilasboasi       | Phyllomys unicolor         | Serpophaga hypoleuca        |
| Leptasthenura platensis      | Phylloscartes beckeri      | Speothos venaticus          |
| Leptodon forbesi             | Phylloscartes ceciliae     | Sporophila falcirostris     |
| Limnodromus griseus          | Phylloscartes roquettei    | Sporophila frontalis        |
| Lonchophylla dekeyseri       | Physalaemus caete          | Sporophila hypoxantha       |
| Lonchorhina aurita           | Physalaemus maximus        | Sporophila melanogaster     |
| Lophornis gouldii            | Physalaemus soaresi        | Sporophila nigrorufa        |
| Marmosops paulensis          | Picus chrysochloros        | Sporophila palustris        |
| Mazama bororo                | Picumnus varzeae           | Sporophila ruficollis       |
| Mazama nana                  | Pionus reichenowi          | Stigmatura napensis         |
| Melanophryniscus admirabilis | Pipile jacutinga           | Stymphalornis acutirostris  |
| Melanophryniscus             | Piprites chloris           | Synallaxis infuscata        |
| cambaraensis                 | Platyrinchus mystaceus     | Synallaxis kollari          |
| Melanophryniscus dorsalis    | Porzana spiloptera         | Tangara cyanocephala        |
| Mergus octosetaceus          | Priodontes maximus         | Tangara fastuosa            |
| Merulaxis stresemanni        | Procellaria aequinoctialis | Tangara peruviana           |
| Mico rondoni                 | Procellaria conspicillata  | Tangara velia               |
| Microakodontomys             | Proceratophrys moratoi     | Taoniscus nanus             |
| transitorius                 | Proceratophrys palustris   | Tapirus terrestris          |
| Momotus momota               | Procnias albus             | Tayassu pecari              |
| Monasa morphoeus             | Pseudalopex vetulus        | Terenura sicki              |
| Morphnus guianensis          | Pseudoseisura lophotes     | Thalassarche chlororhynchos |
| Myrmeciza ruficauda          | Psophia dextralis          | Thalpomys cerradensis       |
| Myrmecophaga tridactyla      | Psophia obscura            | Thalpomys lasiotis          |
| Myrmotherula fluminensis     | Psophia viridis            | Thalurania watertonii       |
| Myrmotherula klagesi         | Pterodroma deserta         | Thamnomanes caesius         |
| Myrmotherula minor           | Pterodroma incerta         | Thamnophilus aethiops       |
| Myrmotherula snowi           | Pteroglossus bitorquatus   | Thamnophilus caeruleus      |
| Myrmotherula urosticta       | Pteronura brasiliensis     | Thamnophilus nigrocinereus  |
| Nemosia rourei               | Pulsatrix perspicillata    | Thoropa petropolitana       |
| Neomorphus geoffroyi         | Puma concolor              | Thoropa saxatilis           |
| Neopelma aurifrons           | Pyriglena atra             | Thripophaga macroura        |
| Nothura minor                | Pyrrhura vulturina         | Thylamys macrurus           |
| Nyctibius aethereus          | Pyrrhura cruentata         | Thylamys velutinus          |
| Nyctibius leucopterus        | Pyrrhura griseipectus      | Tigrisoma fasciatum         |
| Odontophorus capueira        | Pyrrhura lepida            | Tijuca condita              |
| Oligoryzomys rupestris       | Pyrrhura leucotis          | Tinamus tao                 |
| Ortalis guttata              | Pyrrhura pflimeri          | Tolypeutes tricinctus       |
| Oryzoborus maximiliani       | Rhegmatorhina gymnops      | Touit melanonotus           |
| Ozotoceros bezoarticus       | Rhipidomys cariri          | Touit surdus                |
| Panthera onca                | Rhopornis ardesiacus       | Trichechus inunguis         |
| Paratelmatorhynchus lutzii   | Saguinus bicolor           | Trichechus manatus          |
| Penelope jacucaca            | Saguinus niger             | Trinomys eliasi             |

Trinomys mirapitanga  
Trinomys moojeni  
Trinomys yonenagae  
Trogon collaris  
Wilfredomys oenax  
Xanthopsar flavus

Xenohyla truncata  
Xenops minutus  
Xeronycteris vieirai  
Xiphocolaptes falcirostris  
Xiphocolaptes  
promeropirhynchus

Xipholena atropurpurea  
Xiphorhynchus fuscus  
Xiphorhynchus guttatus  
Xolmis dominicanu

Table S2: Links between GLOBIOM-Brazil land use classes and IUCN species habitat classes. In order to assess how GLOBIOM-Brazil land use change projections affect species habitat availability, the GLOBIOM-Brazil land use classes were linked to IUCN species habitat classes. Species were assumed to survive within a GLOBIOM-Brazil land use if their IUCN habitat classes linked to this land use.

| <b>GLOBIOM-Brazil land use class</b> | <b>Links to IUCN species classes in scenarios assuming forest species cannot recolonize reforested areas</b>                                                                                                                                                                                                                                                                                                                                                                                                                                                                          | <b>Links to IUCN species classes in scenarios assuming forest species can recolonize reforested areas</b>                                                                                                                                                                                                                                                                                                                                                                                                                                                                             |
|--------------------------------------|---------------------------------------------------------------------------------------------------------------------------------------------------------------------------------------------------------------------------------------------------------------------------------------------------------------------------------------------------------------------------------------------------------------------------------------------------------------------------------------------------------------------------------------------------------------------------------------|---------------------------------------------------------------------------------------------------------------------------------------------------------------------------------------------------------------------------------------------------------------------------------------------------------------------------------------------------------------------------------------------------------------------------------------------------------------------------------------------------------------------------------------------------------------------------------------|
| <b>Cropland</b>                      | Artificial/Terrestrial; Artificial/Terrestrial - Arable Land                                                                                                                                                                                                                                                                                                                                                                                                                                                                                                                          | Artificial/Terrestrial; Artificial/Terrestrial - Arable Land                                                                                                                                                                                                                                                                                                                                                                                                                                                                                                                          |
| <b>Grassland</b>                     | Artificial/Terrestrial; Artificial/Terrestrial - Pastureland                                                                                                                                                                                                                                                                                                                                                                                                                                                                                                                          | Artificial/Terrestrial; Artificial/Terrestrial - Pastureland                                                                                                                                                                                                                                                                                                                                                                                                                                                                                                                          |
| <b>Unmanaged Forest</b>              | Forest; Forest; Forest – Boreal; Forest – Subantarctic; Forest – Subarctic; Forest - Subtropical/Tropical Dry; Forest - Subtropical/Tropical Mangrove Vegetation Above High Tide Level; Forest - Subtropical/Tropical Moist Lowland; Forest - Subtropical/Tropical Moist Montane; Forest - Subtropical/Tropical Swamp; Forest – Temperate; Savanna; Savanna – Dry; Savanna – Moist                                                                                                                                                                                                    | Forest; Forest; Forest – Boreal; Forest – Subantarctic; Forest – Subarctic; Forest - Subtropical/Tropical Dry; Forest - Subtropical/Tropical Mangrove Vegetation Above High Tide Level; Forest - Subtropical/Tropical Moist Lowland; Forest - Subtropical/Tropical Moist Montane; Forest - Subtropical/Tropical Swamp; Forest – Temperate; Savanna; Savanna – Dry; Savanna – Moist                                                                                                                                                                                                    |
| <b>Forest Regrowth</b>               | Artificial/Terrestrial - Subtropical/Tropical Heavily Degraded Former Forest                                                                                                                                                                                                                                                                                                                                                                                                                                                                                                          | Artificial/Terrestrial - Subtropical/Tropical Heavily Degraded Former Forest; Forest; Forest; Forest – Boreal; Forest – Subantarctic; Forest – Subarctic; Forest - Subtropical/Tropical Dry; Forest - Subtropical/Tropical Mangrove Vegetation Above High Tide Level; Forest - Subtropical/Tropical Moist Lowland; Forest - Subtropical/Tropical Moist Montane; Forest - Subtropical/Tropical Swamp; Forest – Temperate                                                                                                                                                               |
| <b>Other natural land</b>            | Grassland; Grassland – Subantarctic; Grassland – Subarctic; Grassland - Subtropical/Tropical Dry; Grassland - Subtropical/Tropical High Altitude; Grassland - Subtropical/Tropical Seasonally Wet/Flooded; Grassland – Temperate; Grassland – Tundra; Savanna; Savanna – Dry; Savanna – Moist; Shrubland; Shrubland – Boreal; Shrubland - Mediterranean-type Shrubby Vegetation; Shrubland – Subantarctic; Shrubland – Subarctic; Shrubland - Subtropical/Tropical Dry; Shrubland - Subtropical/Tropical High Altitude; Shrubland - Subtropical/Tropical Moist; Shrubland - Temperate | Grassland; Grassland – Subantarctic; Grassland – Subarctic; Grassland - Subtropical/Tropical Dry; Grassland - Subtropical/Tropical High Altitude; Grassland - Subtropical/Tropical Seasonally Wet/Flooded; Grassland – Temperate; Grassland – Tundra; Savanna; Savanna – Dry; Savanna – Moist; Shrubland; Shrubland – Boreal; Shrubland - Mediterranean-type Shrubby Vegetation; Shrubland – Subantarctic; Shrubland – Subarctic; Shrubland - Subtropical/Tropical Dry; Shrubland - Subtropical/Tropical High Altitude; Shrubland - Subtropical/Tropical Moist; Shrubland - Temperate |

Figure S1: Impacts of assumptions on species distribution relative to land use.

Since the resolution of the GLOBIOM-Brazil land use change projects is different to the information on species ranges and habitat requirements a number of assumptions needed to be made to link the datasets. The GLOBIOM-Brazil land use change projections are provided as the proportion of 6 different land use classes within a 0.5° grid (approximately 50x50km), while the species ranges are available as higher resolution vectors. Therefore an assumption needed to be made on where within a gridcell the land use change occurred in relation to the species ranges. Additionally, an assumption was needed on whether species could recolonize newly abandoned land. The minimum species habitat loss 2010 to 2050 would occur if in each gridcell habitat loss first occurs outside species ranges and species can maximise new habitat (A). The maximum species habitat loss 2010 to 2050 would occur if in each gridcell habitat loss first occurs inside species ranges and species cannot use newly abandoned land (B).

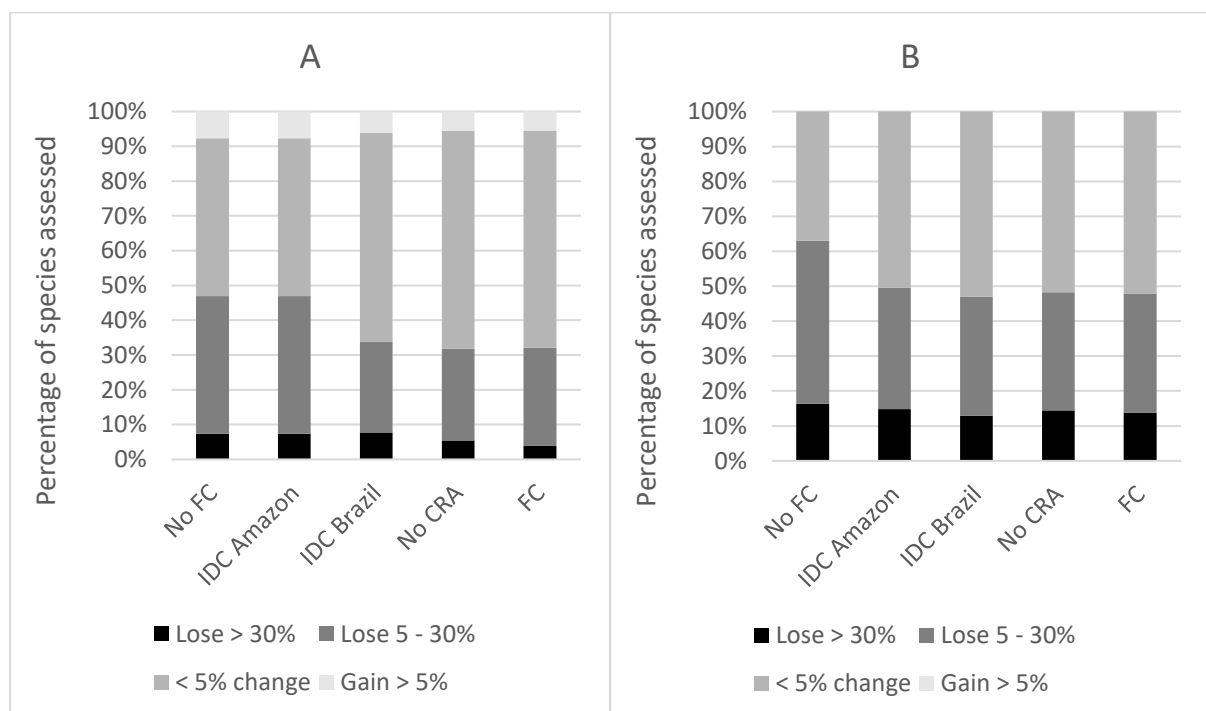

Figure S2: Impacts of assumptions on priority area distribution relative to land use. As with species ranges, the resolution of the GLOBIOM-Brazil land use change projections is also different to the information on biodiversity priority areas. Therefore, a number of assumptions needed to be made to link these datasets. The GLOBIOM-Brazil land use change projections are provided as the proportion of 6 different land use classes within a 0.5° grid (approximately 50x50km). The biodiversity priority areas are available as higher resolution vectors. The assumption regarding where forest is located in relation to priority areas in both relevant time periods (i.e. 2010 and where forest loss occurs in relation to priority areas) can have a large impact on the amount of deforestation projected to occur within priority areas. However, the pattern between scenarios remains the same.

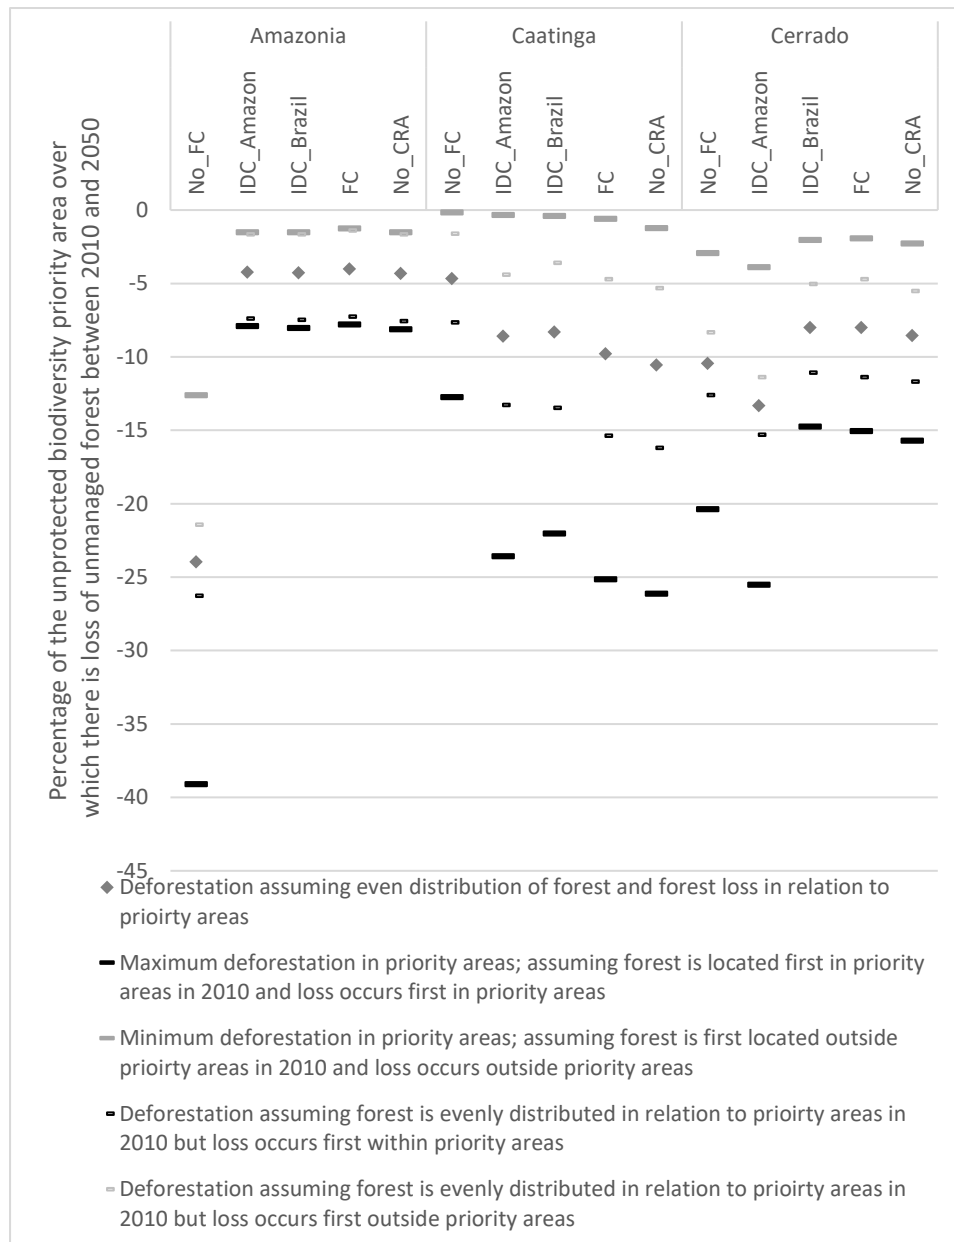

## References – Supplementary Material

Guidotti, V., Freitas, F., Sparovek, G., Pinto, L., Hamamura, C., Carvalho, T., Cerignoni, F. (2017) *Números detalhados do novo código florestal e suas implicações para os PRAs*, Tech. Report, IMAFLORA. Available at:  
[http://www.imaflora.org/downloads/biblioteca/5925cada05b49\\_SUSTemDEB\\_low\\_web\\_links.pdf](http://www.imaflora.org/downloads/biblioteca/5925cada05b49_SUSTemDEB_low_web_links.pdf)

Soterroni, A. C., Mosnier, A., Carvalho, A. X. Y., Camara, G., Obersteiner, M., Andrade, P. R., . . . Ramos F. M. (2018). Future environmental and agricultural impacts of Brazil's Forest Code. *Environmental Research Letters* 13, 074021. doi: [10.1088/1748-9326/aacbb](https://doi.org/10.1088/1748-9326/aacbb)
